# Supplementary material
Source: Springer Nature journal article supplement (https://www.springermedizin.de/resource/supplementary/12958_2012_1100_MOESM2_ESM.pdf/9566808)

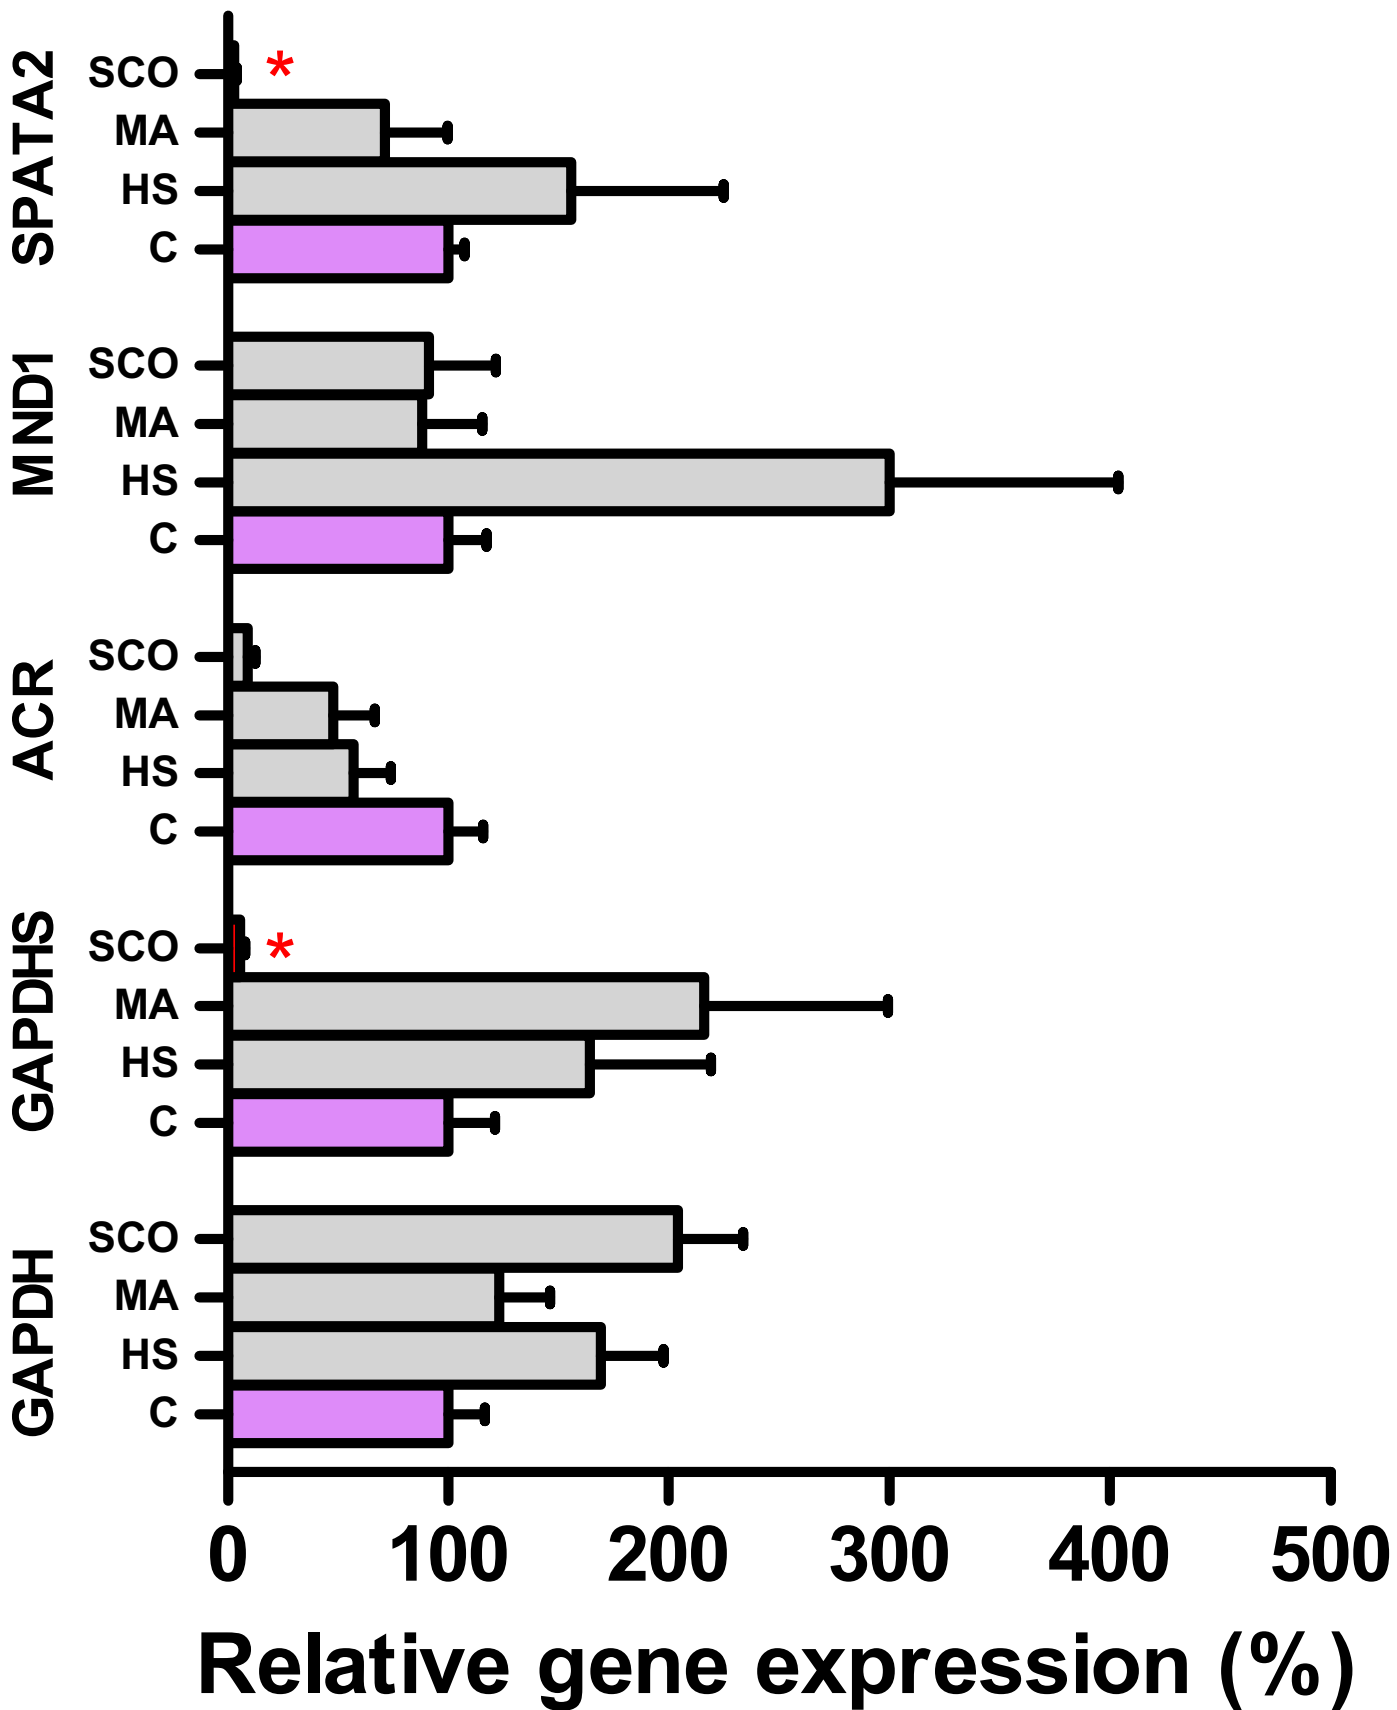

Supplement: MOESM2 [file 9566808]
